# Supplementary material
Source: PubMed Central journal article supplement (PMC6733259)
Supplement: NIHMS1526313-supplement-Supplemental.pdf [file NIHMS1526313-supplement-Supplemental.pdf]

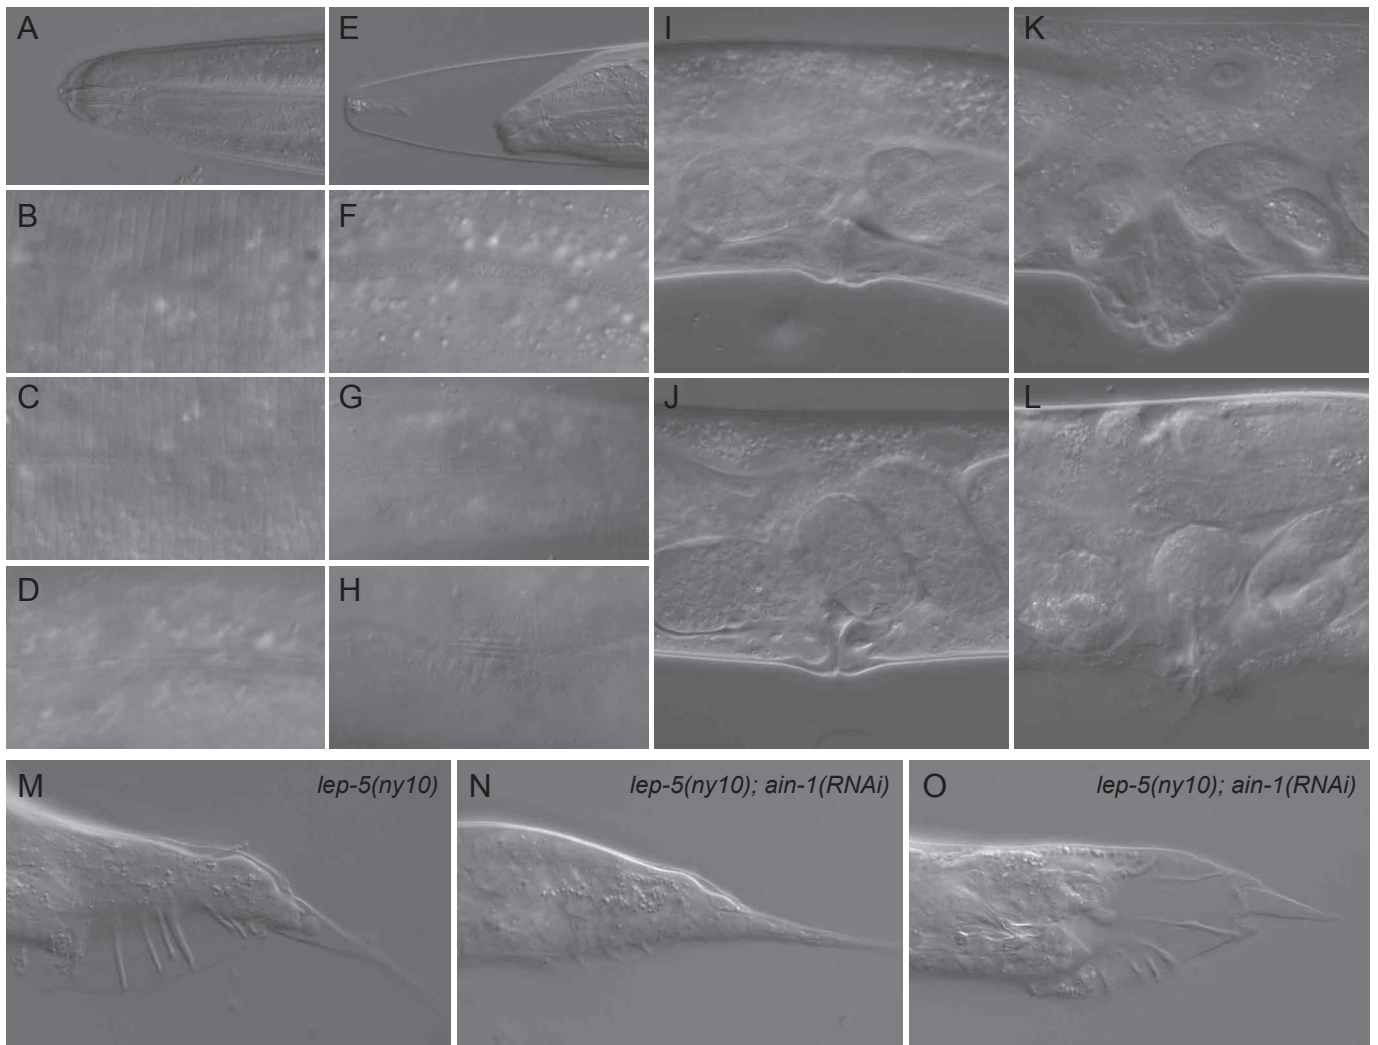

**Figure S1. Additional *lep-5(ny10)* phenotypes, related to Figure 1.**

(A, E): Head of a hermaphrodite undergoing a supernumerary molt. (B-D) Lateral fields of hermaphrodites before the supernumerary molt. There are no alae (B), incomplete alae (C) or very weak alae (D) in the anterior part of the body; the posterior part of the body usually lacks alae. (F-H) lateral fields of hermaphrodites after the supernumerary molt: Alae are disorganized (F) or incomplete (G and H). (I, J): vulva before (I) and after initiation of the supernumerary molt (J). (K, L) vulva after completion of the supernumerary molt; the animals are Pvul and Egl. (M) Adult male tail with normal fan and Lep tail tip undergoing delayed TTM. (N) Tail of an adult male after *ain-1* RNAi treatment. The fan is narrow and the rays are short, indicating a defect in anterior retraction. (O) Tail of an adult male after *ain-1* RNAi treatment in ventral view showing extreme ectopic retraction of the tail tissue. Rays and phasmids are attached to the cuticle and appear as long processes.

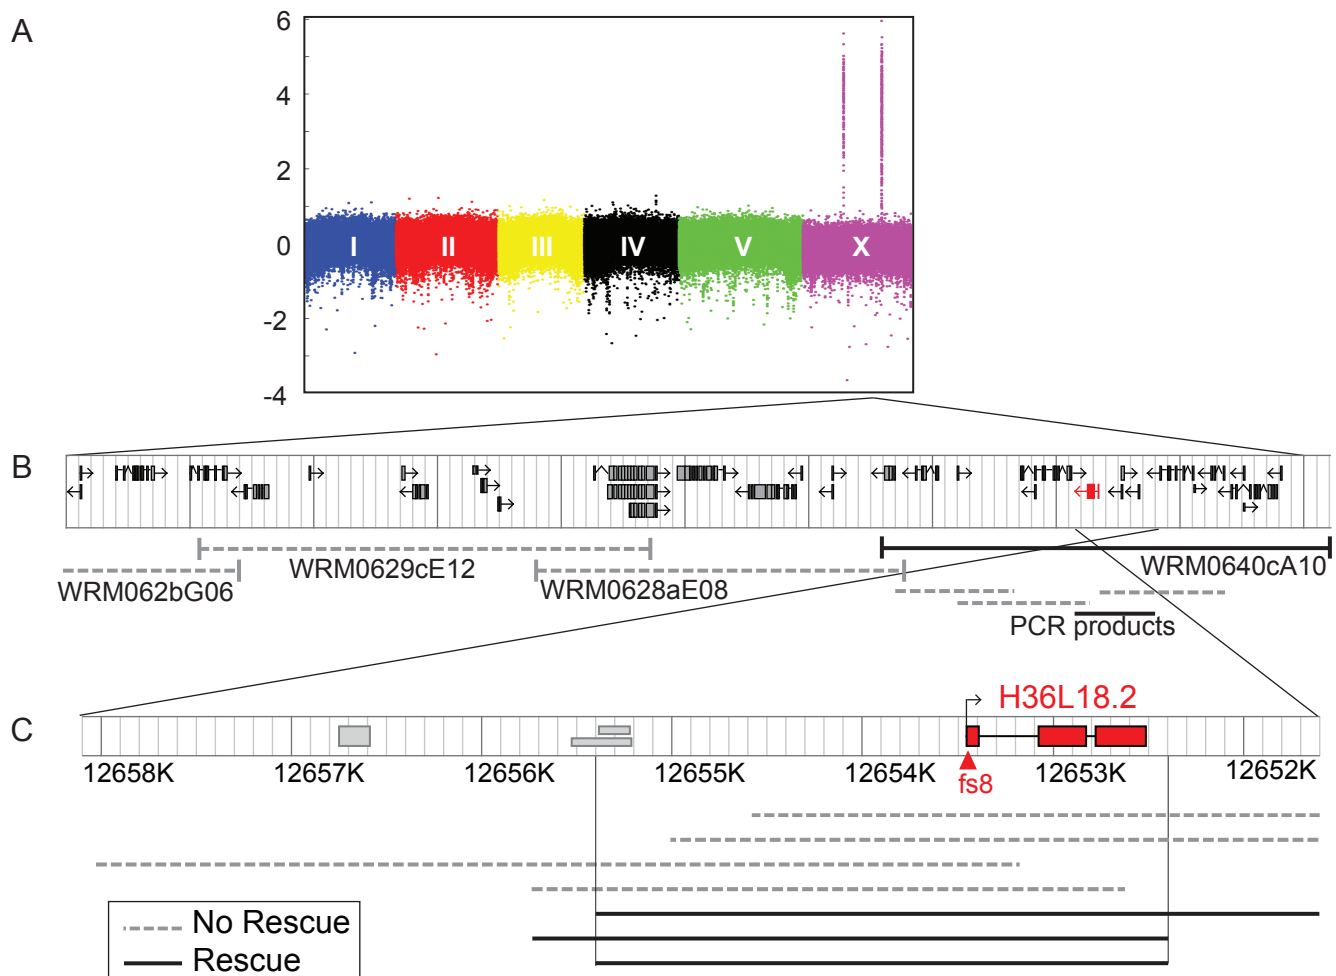

**Figure S2. Mapping of *lep-5*, related to Figure 2.** (A) Rainbow plot showing the result of array comparative genomic hybridization with DNA from strain DF70 carrying the *lep-5(ny10)* mutation compared to DNA from the control CB4088 strain. DF70 shows two deletions in chromosome X. Subsequent analysis determined that *lep-5(ny10)* is associated with the right deletion. (B) The 80Kb region deleted in *lep-5(ny10)* contains 32 predicted genes and one pseudogene in wild-type DNA. Dashed and solid lines indicate fosmids and PCR products used in experiments to rescue the *lep-5(ny10)* phenotype. (C) Genomic region containing *H36L18.2/lep-5* and graphic display of fragments used in rescue experiments with *lep-5(fs8)*. A minimum length of 1970 nucleotides upstream of the transcription start site of *lep-5* was required for successful rescue, indicating that this region contains important regulatory sites. The point mutation in *lep-5(fs8)* is marked by a red triangle.



**Figure S3. Alignments for *lep-5* orthologs from *Caenorhabditis* species; related to Figure 2.** (A) ClustalOmega alignment of *lep-5* sequences from 19 *Caenorhabditis* species. The manually added SL1 sequence is in lowercase letters. Sequencing gaps of unknown size in *Caenorhabditis* sp. 29 and *C. sp. 32* are indicated by "N". Invariant positions are marked by asterisks. The most highly conserved regions are at the 5'- and 3'-ends of the sequence. (B) MAFFT alignment of *lep-5* coding sequences, cDNA, and genomic sequences from 26 *Caenorhabditis* species. Sequences were identified and aligned as described in the Supplemental Experimental Procedures. The first 19 *lep-5* coding sequences from the *Elegans* supergroup (Kiontke et al., 2011) are identical to those in Figure S3. Portions of those 19 *lep-5* sequences shown here correspond to the following subsequences: *C. afra*, nt 1-563; *C. brenneri*, nt 1-517; *C. briggsae*, nt 1-547; *C. doughertyi*, nt 1-507; *C. elegans*, nt 1-524; *C. japonica*, nt 1-481; *C. kamaaina*, nt 1-498; *C. latens*, nt 1-531; *C. macrosperma*, nt 1-511; *C. nigoni*, nt 1-547; *C. nouraguensis*, nt 1-491; *C. remanei*, nt 1-521; *C. sinica*, nt 1-527; *C. sp. 28*, nt 1-503; *C. sp. 29*, nt 1-472; *C. sp. 32*, nt 1-506; *C. sp. 40*, nt 1-521; *C. tropicalis*, nt 2-503; and *C. wallacei*, nt 1-534. The portion of the *C. angaria lep-5* cDNA sequence shown corresponds to nt 1-484. Other *lep-5* genomic sequences come from the following genome assemblies (given as source URLs), scaffolds within each assembly, and nucleotide coordinates within each scaffold. *C. angaria*: [ftp://ftp.wormbase.org/pub/wormbase/releases/WS250/species/c\\_angaria/PRJNA51225/c\\_angaria.PRJNA51225.WS250.genomic.fa.gz](ftp://ftp.wormbase.org/pub/wormbase/releases/WS250/species/c_angaria/PRJNA51225/c_angaria.PRJNA51225.WS250.genomic.fa.gz); Cang\_2012\_03\_13\_00001, nt 687,640-688,300. *C. castelli*: [http://bang.bio.ed.ac.uk/caenorhabditis/caenorhabditis\\_castelli\\_JU1956/caenorhabditis\\_castelli\\_JU1956\\_clcSE\\_1.fna](http://bang.bio.ed.ac.uk/caenorhabditis/caenorhabditis_castelli_JU1956/caenorhabditis_castelli_JU1956_clcSE_1.fna); caenorhabditis\_castelli\_JU1956\_contig\_8515; nt 5,033-4,388 (reverse complement of genomic sequence). *C. sp. 38*: [http://bang.bio.ed.ac.uk/caenorhabditis/caenorhabditis\\_sp38\\_JU2809/caenorhabditis\\_sp38\\_JU2809\\_SPADES\\_assembly.fna](http://bang.bio.ed.ac.uk/caenorhabditis/caenorhabditis_sp38_JU2809/caenorhabditis_sp38_JU2809_SPADES_assembly.fna); caenorhabditis\_sp38\_JU2809\_NODE\_347\_length\_42521\_cov\_117.126\_ID\_693; nt 32,100-32,703. *C. plicata*: [http://bang.bio.ed.ac.uk/caenorhabditis/caenorhabditis\\_plicata\\_SB355/caenorhabditis\\_plicata\\_SB355\\_clcPEcleaned\\_2.fna](http://bang.bio.ed.ac.uk/caenorhabditis/caenorhabditis_plicata_SB355/caenorhabditis_plicata_SB355_clcPEcleaned_2.fna); caenorhabditis\_plicata\_SB355\_contig\_1792; nt 2,077-2,506. *C. virilis*: [http://bang.bio.ed.ac.uk/caenorhabditiscaenorhabditis\\_virilis\\_JU1968caenorhabditis\\_virilis\\_JU1968\\_clcSE\\_1.fna](http://bang.bio.ed.ac.uk/caenorhabditiscaenorhabditis_virilis_JU1968caenorhabditis_virilis_JU1968_clcSE_1.fna); caenorhabditis\_virilis\_JU1968\_contig\_2216; nt 27,994-27,457 (reverse complement of genomic sequence). *C. sp. 43*: [http://bang.bio.ed.ac.uk/caenorhabditis/caenorhabditis\\_sp43\\_NIC1070/caenorhabditis\\_sp43\\_NIC1070\\_clcSE\\_1.fna](http://bang.bio.ed.ac.uk/caenorhabditis/caenorhabditis_sp43_NIC1070/caenorhabditis_sp43_NIC1070_clcSE_1.fna); caenorhabditis\_sp43\_NIC1070\_contig\_49733; nt 106-641. *C. sp. 31*: [http://bang.bio.ed.ac.uk/caenorhabditis/caenorhabditis\\_sp31\\_JU2585/caenorhabditis\\_sp31\\_JU2585\\_clcSE\\_1.fna](http://bang.bio.ed.ac.uk/caenorhabditis/caenorhabditis_sp31_JU2585/caenorhabditis_sp31_JU2585_clcSE_1.fna); caenorhabditis\_sp31\_JU2585\_contig\_6880; nt 9,510-8,889 (reverse complement of genomic sequence).

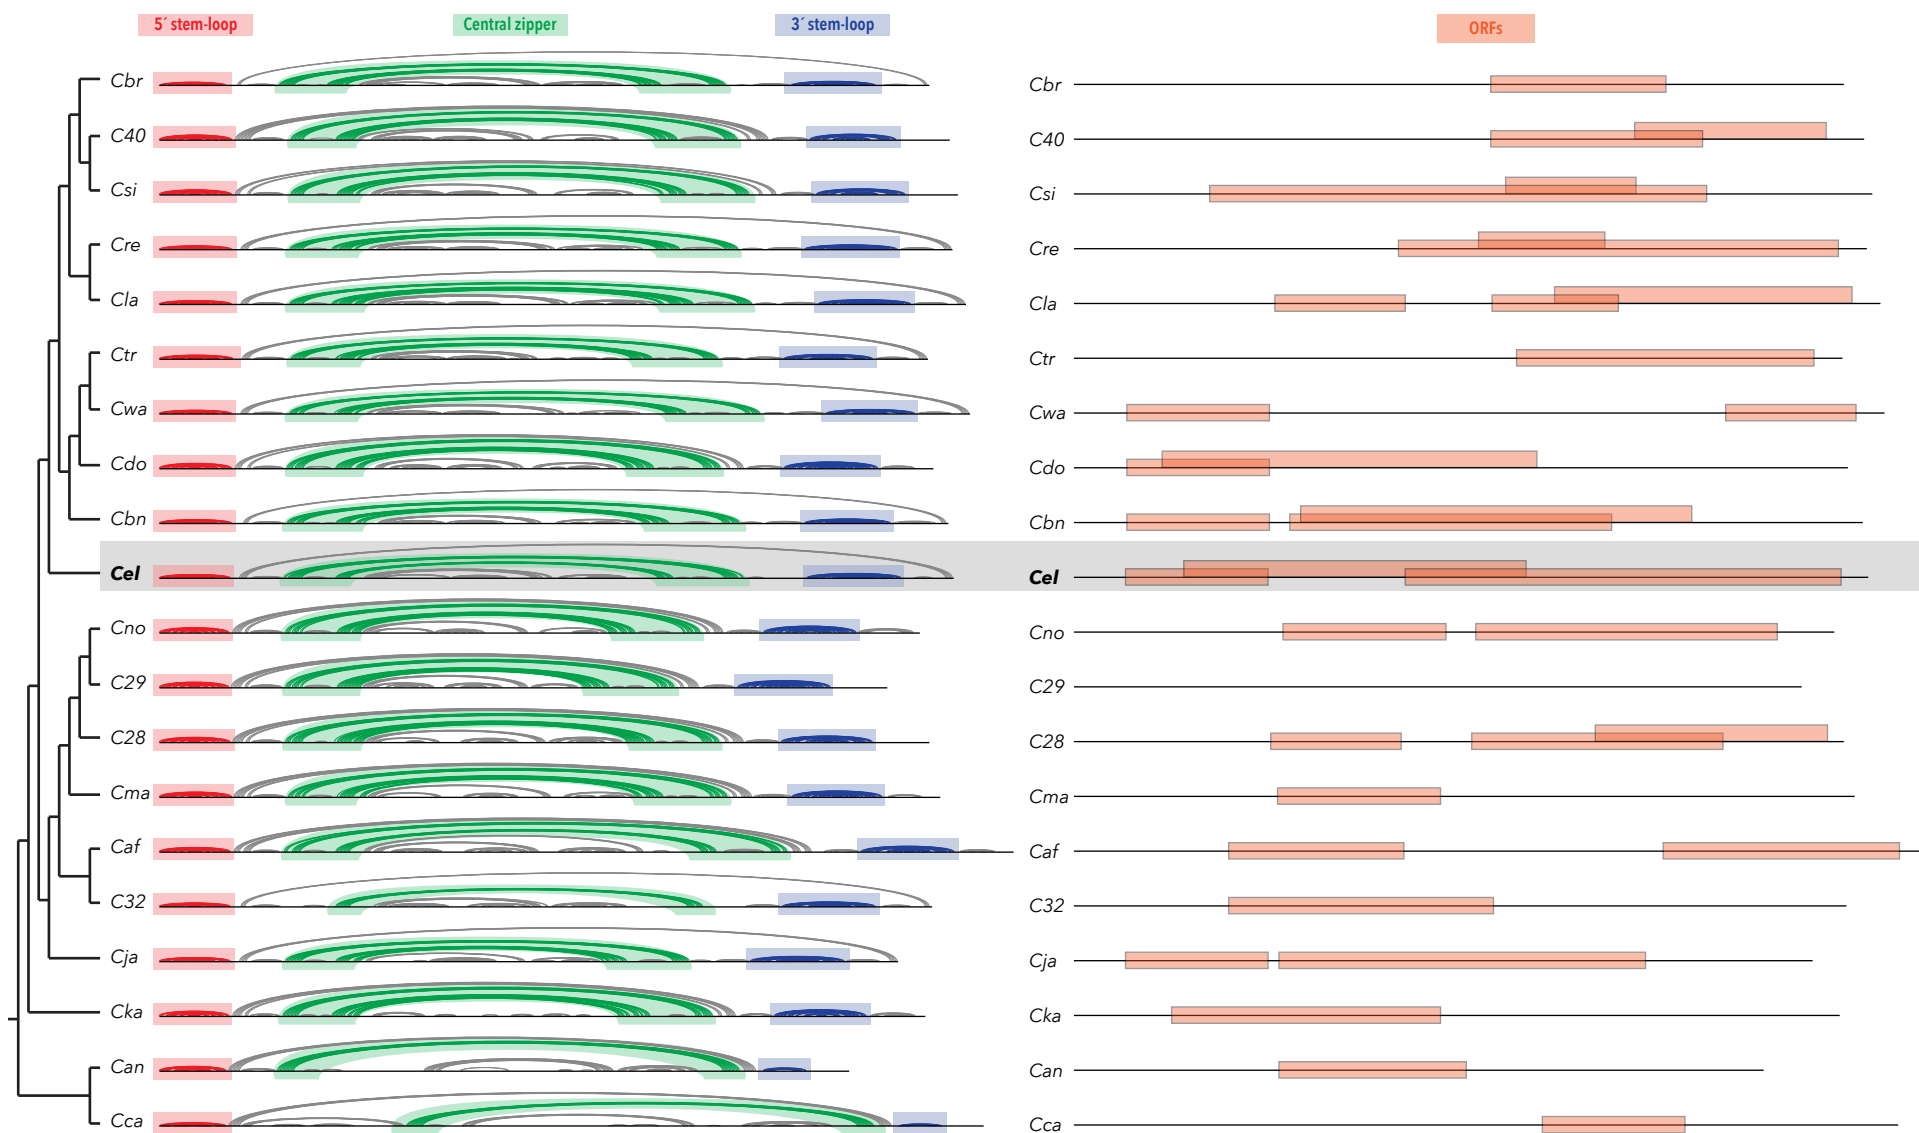

**Figure S4. Conservation of predicted *lep-5* secondary structure (left; 5' stem-loop, central zipper, and 3'-stem-loop) and non-conservation of predicted ORFs (right) among 20 species of *Caenorhabditis*; related to Figure 2.** Turbofold predictions of secondary structures in linear format drawn using VARNA are shown at left for species of *Caenorhabditis*, showing their phylogenetic position (cladogram at far left). Relative positions of ORFs predicted for each *lep-5* ortholog are depicted as orange bars at right. Abbreviations for species are: *Cbr*: *C. briggsae*, *C40*: *C. sp. 40*, *Csi*: *C. sinica*, *Cre*: *C. remanei*, *Cla*: *C. latens*, *Ctr*: *C. tropicalis*, *Cwa*: *C. wallacei*, *Cdo*: *C. doughertyi*, *Cbn*: *C. brenneri*, *Cel*: *C. elegans*, *Cno*: *C. nouraguensis*, *C29*: *C. sp. 29*, *C28*: *C. sp. 28*, *Cma*: *C. macrosperma*, *Caf*: *C. afra*, *C32*: *C. sp. 32*, *Cja*: *C. japonica*, *Cka*: *C. kamaaina*, *Can*: *C. angaria*, *Cca*: *C. castelli*. See Supplemental Experimental Procedures for details about secondary structure and ORF predictions.

A Wild type

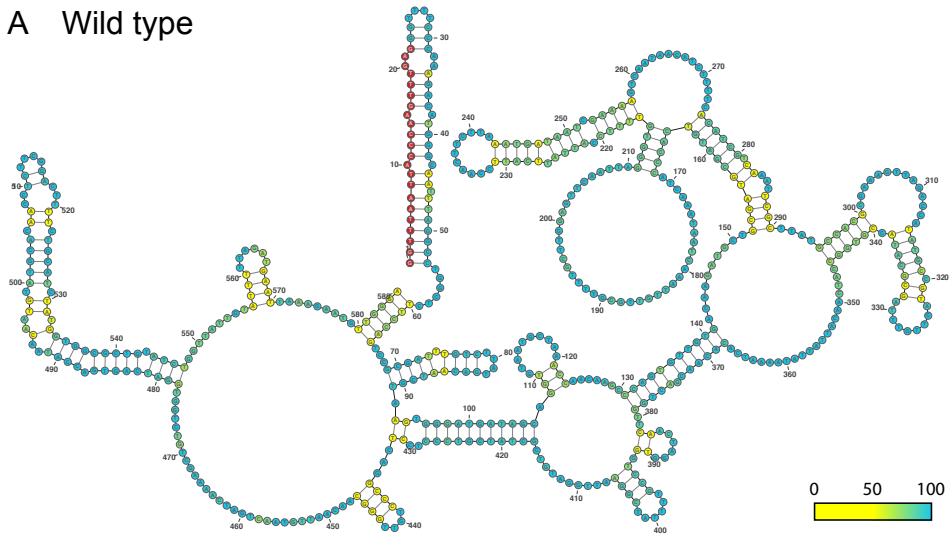

B G23A (*fs8*)

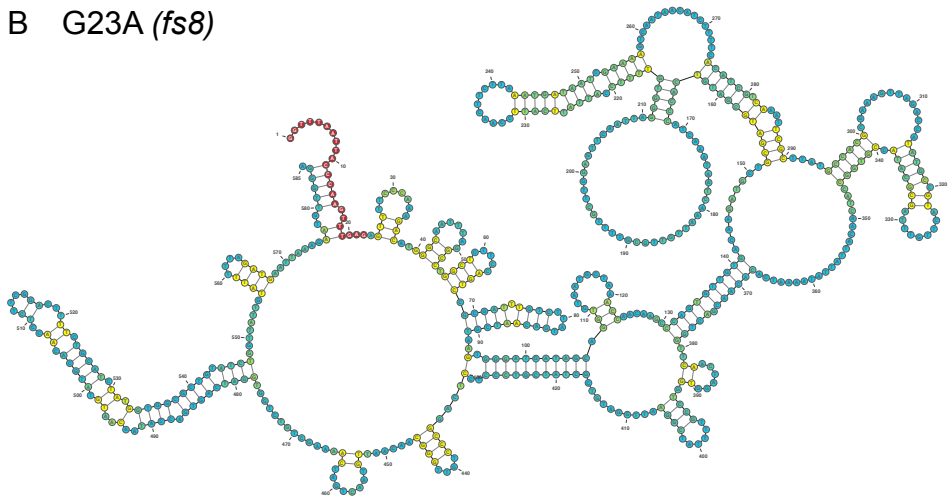

C G23A C30T

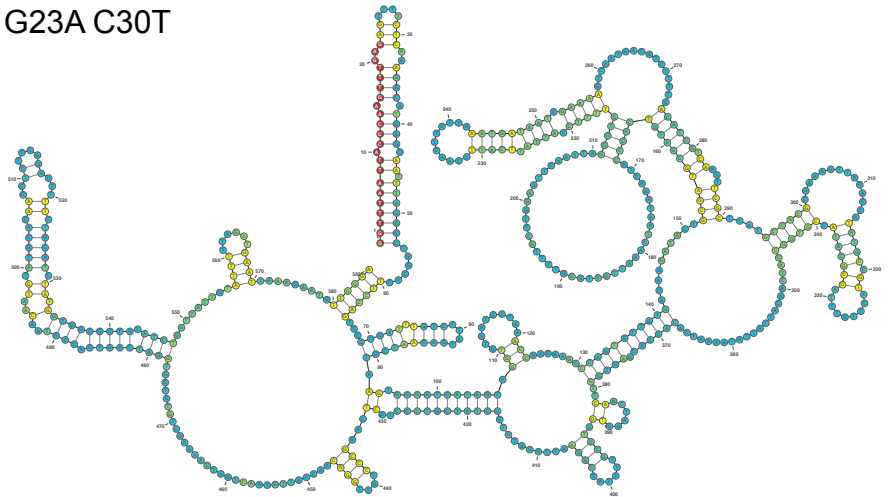

**Figure S5. Predicted structures of *lep-5* RNAs indicating base-pairing confidence, related to Figure 2.** Shown are predictions for the secondary structure of full-length (A) wild-type *lep-5*, (B) *lep-5*(G23A), and (C) *lep-5*(G23A C30T). SL1 sequence is shown in red. Other nucleotide positions are colored according to base-pairing confidence as predicted by Turbofold, with yellow and blue representing low and high confidence, respectively.

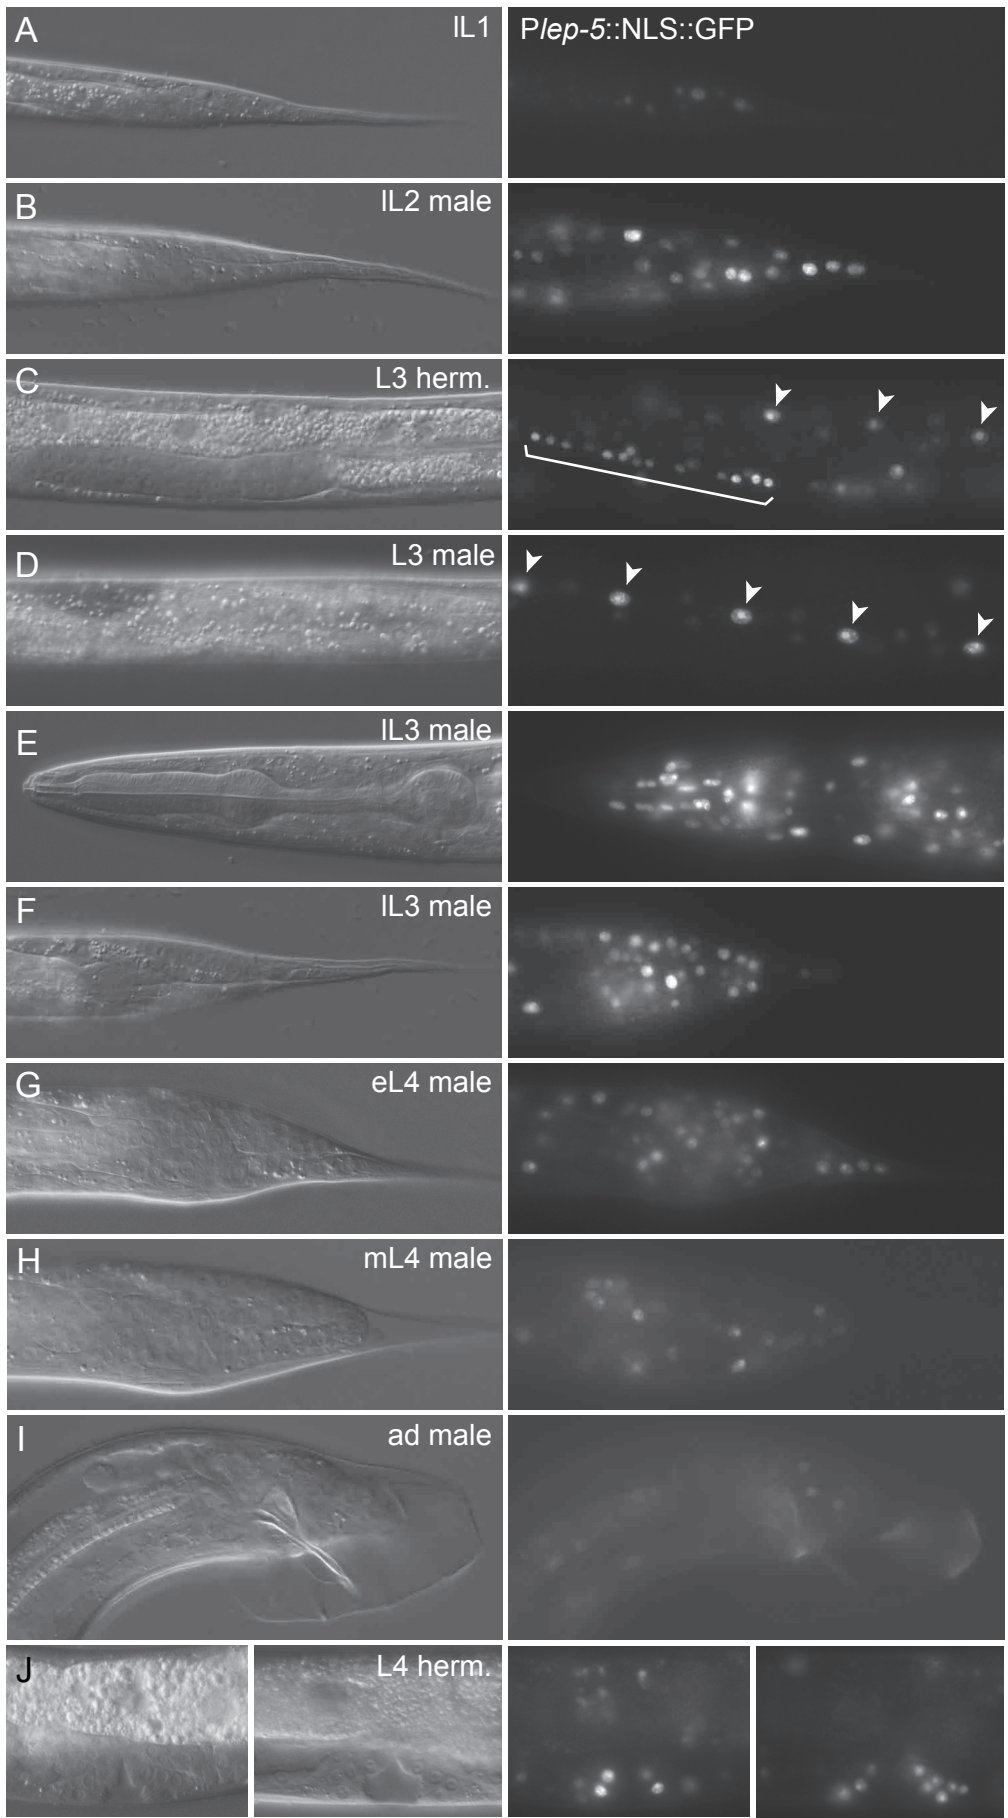

**Figure S6. Spatiotemporal expression of *Plep-5::NLS::GFP*, related to Figure 3.** (DIC images left, fluorescent images right.) Expression begins to be faintly visible in late L1 animals (A). It becomes bright during L2 and remains bright until late L3 (C-F). Expression diminishes in early-mid-L4 (G, H) and is almost gone in adults (I). Expression is observed in the tail epidermis including the tail tip cells (B, F, G)), in the pharynx muscles (E), nerve cells in the pharynx (E) and cloacal region (F) and in the ventral nerve cord (C, bracket). The reporter is also expressed in seam cells (arrowheads in C and D) and in the vulva cells during vulva morphogenesis (J).

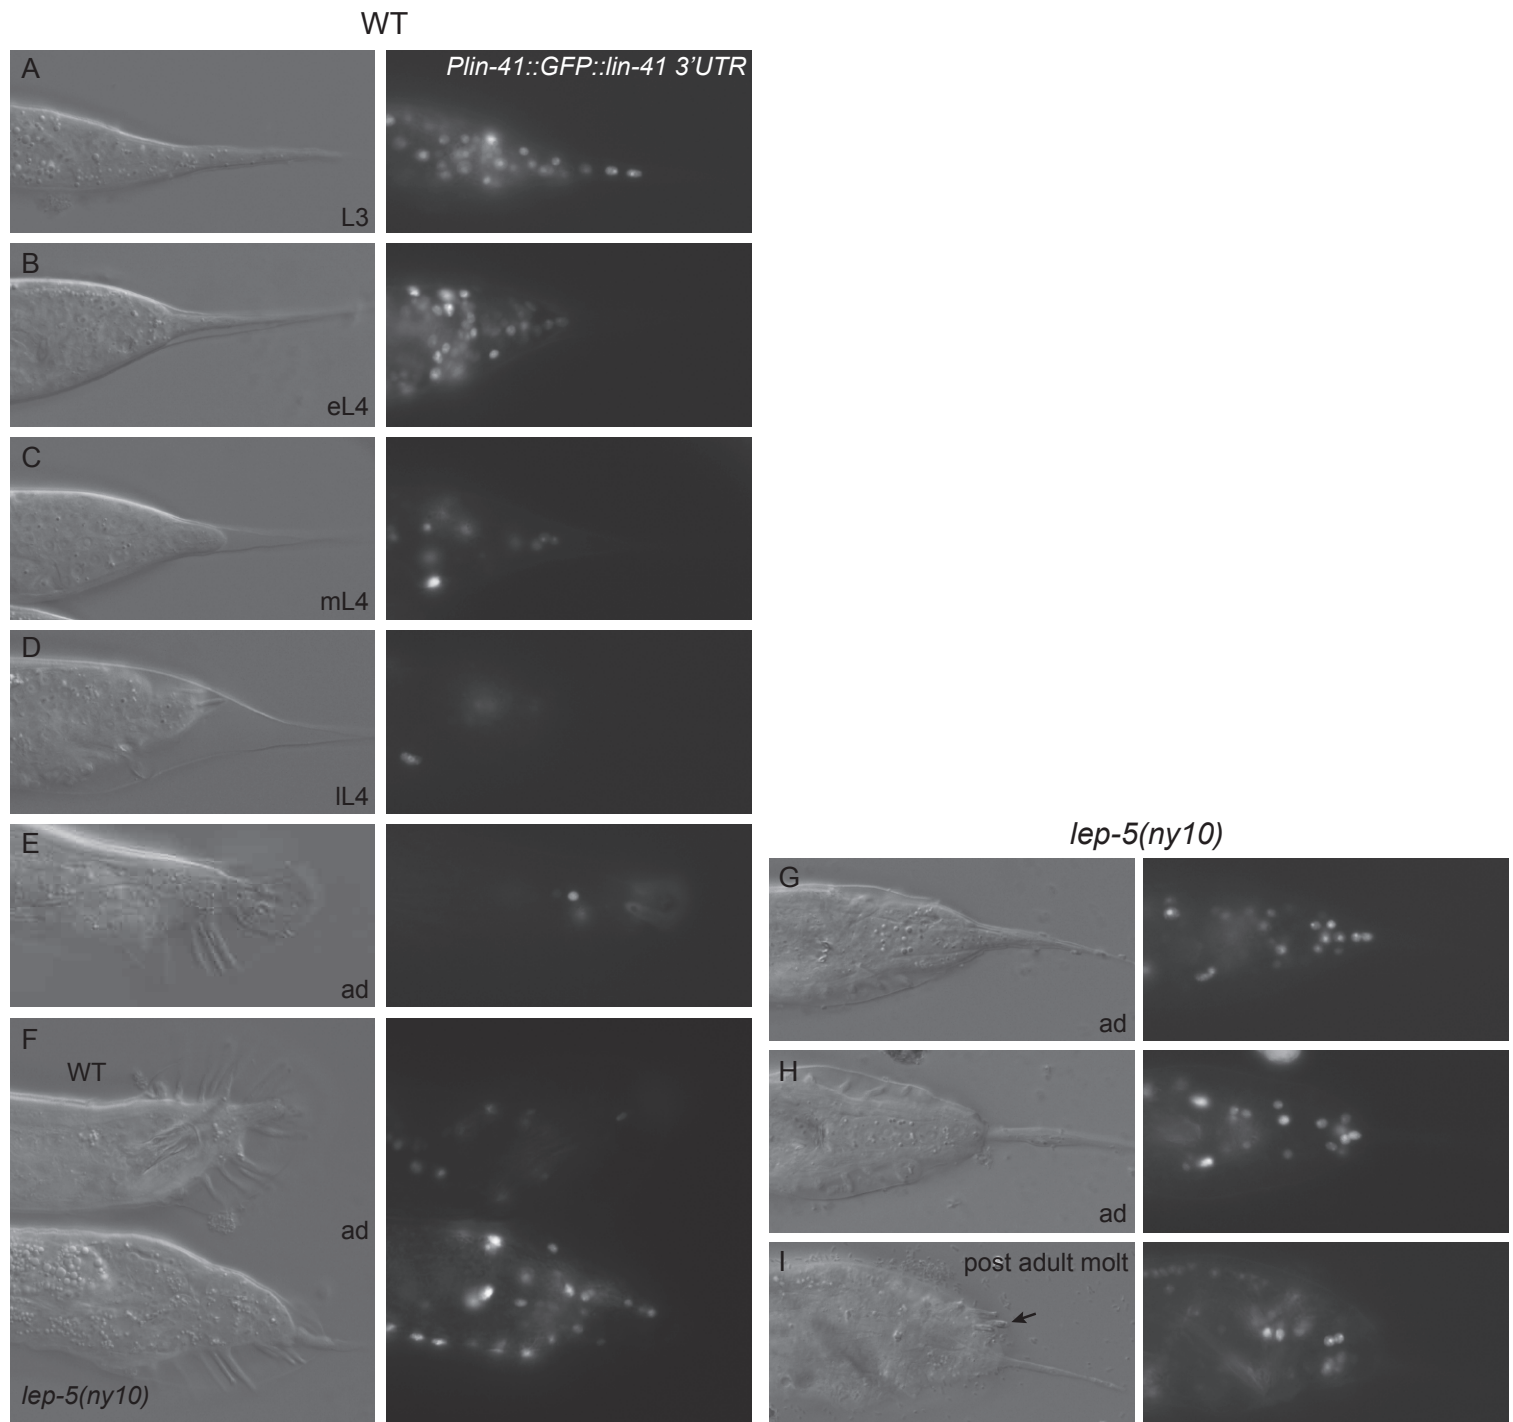

**Figure S7. *lin-41* expression persists into adulthood in *lep-5* mutants, related to Figure 4.**

Expression of a transcriptional *Plin-41::NLS::GFP::lin-41 3'UTR* reporter in wild type and *lep-5(ny10)* mutant animals (left panels show DIC images for comparison). In wild type (A-E), the reporter is expressed brightly in many nuclei of the tail, including the tail tip cells in larvae as early as L2. It diminishes after the L3 stage and is restricted to few cells in late L4 and adults. (A-E, top animal in F). In *lep-5(ny10)* mutants (bottom animal in F, G-I), expression remains bright in adults and is even visible in older animals that have undergone an ectopic molt (I; arrow points to a ray which remains a finger-like process after molt of the fan).



**Table S1. Primers, guide RNAs, and ssODN repair templates, related to STAR Methods**

Rescue experiments:

pCC1-forward: ggatgtgctgcaaggcgattaagtgg (to test fosmids)  
H36L18.2\_F: gggcgaaatgagctttgaatgattgttcgtgg  
H36L18.2\_R: gaccagataaaggtagctgagcgagattatggtattccg  
lep-5F1: gtaattcgcgtttctaggtg  
lep-5R1: gggcgaaatgagctttga  
lep-5F2: gaccagataaaggtagctgag  
lep-5R2: tgctacaagagcaaagtattta  
lep-5F3: cttcaaacacaactgctcttc  
lep-5R3: tagttgaaccagtcgtgtgt  
lep-5F4: aaagtacatgcgaactgtgt  
lep-5R4: gggcgaaatgagctttga  
lep-5F5: cttcaaacacaactgctcttc  
lep-5R5: accagcatatagagttttgca  
lep-5F6: aaagtacatgcgaactgtgt  
lep-5R6: accagcatatagagttttgca  
attBlep-5F6: *ggggacaactttgtatagaaagttgaaagtacatgcgaactgtgt*  
attBlep-5R6: *ggggactgctttttgtacaaacttgaccagcatatagagttttgca*

Secondary structure modifications:

KKlp5\_expr-9: caaaagtacatgcgaactgtgtgc  
KKlp5\_expr-10: cggctactttggtccattgaatc  
KKlp5\_expr-1: cacttcaaacacaactgctcttccttacc  
KKlp5\_23A+30T-R: gccatgtctttgagaaaactctgaaaattgaaaataatcgataacttaattcg  
KKlp5\_23A+30T-F: aatttaagttatcgattatttcaatttcagagttttctcaaagacatg  
KKOLp5-8a: ccattatgaaaccagtcgtaagcg  
KKlp5\_23C\_R: ccattatgaaaccagtcgtaagcg  
KKlp5\_23C\_F: aatttaagttatcgattatttcaatttcagcgttttcccaaagacatg  
KKlp5\_23C+30G-R: gccatgtctttgagaaaactctgaaaattgaaaataatcgataacttaattcg  
KKlp5\_23C+30G-F: aatttaagttatcgattatttcaatttcagcgttttcccaaagacatg  
RHOLp5-2: gcttgtgttttagcattacacc  
KKlp5\_Cbr-AR: ctaagttgccatgccatcggaagaaccctgaaaattgaaaataatcgataacttaattcg  
KKlp5\_Cbr-BF: tatttatcgaatttaagttatcgattatttcaatttcagcgttttcccgatggcatgggc  
KKlp5\_Cbr-nR: ctctcgtcatggaaaacaacaaag  
KKOLp5-1 taatttaggtactggctgtgtttatgaag  
KKlp5\_Can-AR: gttagatctaatgtccaagttgagcaagctgaaaattgaaaataatcgataacttaattcg  
KKlp5\_Can-BF: cgaatttaagttatcgattatttcaatttcagcgttttcccaaactggcacattag  
KKlp5\_Can-nR: tcagcaagataaatttggagaatcgcg

Site-directed mutagenesis

AA4,5,7F: gcagcatctgtcacaacactaggcttattagtttagcattacacctgctat  
AA4,5,7R: atagcaggtgtaatgctaaactaataagcctagttgtgacaagatgctgc  
AA14,15F: gattatttgatgggtgacatcctatcacagcatctgtcacaacactg  
AA14,15R: cagtgtgtgacaagatgctgtgataggatgacccatcaataatc

Deletions

Δ1F: *gtacgggacgtctatctggttattgatttttagatg*  
Δ1R: *gtacgggacgtcatccaccagacgctttgatcag*  
Δ2F: *gtacgggacgtcgtcaataacatctttcacatcg*  
Δ2R: *gtacgggacgtccaccctaattgaactccaagc*

## CRISPR

lep-5\_5'\_crRNA\_1: gatgggtgaaatgaaaaggg  
lep-5\_3'\_crRNA: ggacttttctgcatctatgg  
KK\_CR\_lep-5\_1: acgcgatgggcagaaatagtagc  
KK\_CR\_lep-5\_2: ttcggtccaacattcttaattc  
lep-5\_fs18\_crRNA: **mUmCAAUUGUUGCGUUUUGCUGUUUUAGAGCUAUGCUGUUUUG**  
lep-5\_fs18\_ssODN: cgatgtcaccatcaaataatcaaattgttgcgttaaagcttggagttcaattaggtgtttccattattcattc  
lep-5-fs18-detect-F: tgtgcaccacaatttcgcaa  
lep-5-fs18-detect-R: tccaccagacagctttgatca  
lep-5\_fs19\_crRNA\_1: **mAmCUGAUCAAAAGCUGUCUGGGUUUUAGAGCUAUGCUGUUUUG**  
lep-5\_fs19\_crRNA\_2: **mGmGACUUUUCUGCAUCUAUGGGUUUUAGAGCUAUGCUGUUUUG**  
lep-5\_fs19\_ssODN: tgttgggcaacaattgtaactgatcaaaagctgtctgaggcgctgtatctggttattgtatttttagatgaat  
lep-5-fs19-detect-F: tcgtcaaattcgcttatgccac  
lep-5-fs19-detect-R: taagcggctactttggtccat  
lep-5\_fs21\_crRNA: **mAmUUUUCAGACAAUCGUAAGUGUUUUAGAGCUAUGCUGUUUUG**  
lep-5\_fs21\_ssODN: aattgctcaattttgtattttcagacaatcgatctgcatgcttggaggtgtaatgctaaccaacaagcccagtggttg  
lep-5\_fs22\_crRNA: **mUmGCCCAACAAGGCCUGAGGAGUUUUAGAGCUAUGCUGUUUUG**  
lep-5\_fs22\_ssODN: caactaggtggtcgtttatcggaattggatgtccaagcatgctcgcacaggcctgttgggcaacaattgtaactgatcaa  
lep-5-fs21-detect-F: tggttaagttgcaggtggct  
lep-5-fs21-detect-R: aactttcgcgtggcataagc  
lep-5-fs22-detect-F: acaagcccagtggttgaca  
lep-5-fs22-detect-R: ccagtcgtaagcggctcact

## Transcriptional reporter

KKkp5\_GFP-R: tcctctgaaaatgttctatgttatgtagtatcacctgaaaattgaaaataatcg  
KKlp5\_GFPB-F: cgaatttaagttatcgatttttcaattttcagggtgataactaacataacatagaacattttc  
MN-lin-44\_8: aacaaaaataggggtgggagcacagg  
RHOLp5-7: cagcattgcagtaattctcttg  
MN-lin-44\_9: gaagctaaaaaacaagaaattaagagaag

## qPCR

Lp5qPCR\_F1: ccaaagacatgggcaatttagg  
Lp5qPCR\_R1: ggcttgttggttagcattacacc  
Y45F10D.4 F: gtcgcttcaaatcagttcagc  
Y45F10D.4 R: gttctgtcaagtgatccgaca  
lin28 FW2: tcgacggtatgatcggagg  
lin28 RV2: gaggtgttgtagcgggag  
Luc-qPCR\_F: gcaaaacgcttccatcttcc  
Luc-qPCR\_R: tccacaaccttcgcttcaaa  
cdc-42F: ctgctggacaggaagattacg  
cdc-42R: ctggacattctcgaatgaag

## C. angaria lep-5

Can\_lep-5\_F: cgagaaactaatcaacgggtgc  
Anchored Oligo(dT): atgttgacgcagccagtgac(T)20vn (v=a,c,g)  
SL1\_primer: ggttaattaccaagttgag  
Can\_lep-5\_R2: tacaatcgatcatcacgaaacaacataatcc  
Can\_lep-5\_Rn: gtttccatggttatgacaagtttg (for heminested PCR with SL1\_primer).
